# Supplementary material
Source: MDPI journal article supplement (https://www.mdpi.com/2073-4441/9/10/730)
Supplement: s1 [file s1]

Investigation of Algal Biotoxin Removal during SWRO Desalination through a Materials Flow Analysis Supplementary Materials

Derek C. Manheim1 and Sunny C. Jiang1*

1Department of Civil and Environmental Engineering, University of California, Irvine, CA, USA

*Corresponding Author: Department of Civil and Environmental Engineering, University of California, Irvine, CA 92617, email: sjiang@uci.edu; Tel: 949–824–5527

Number of Pages: 28
Number of Figures: 11
Number of Tables: 11

**I. Supplementary Methods**

1. Calculation of Process Flows

1.1. GMF Process Flow Calculations

Operational parameters for a single unit conventional granular media filtration (GMF) are listed in Table S1. For a 50 million gallons per day (MGD) plant, we estimated 10 GMF units considering the influent water flow rate is twice the permeate flow rate (8 units plus an additional two units to that are offline during backwashing). The maximum upper limit in water use for these eight operating units is thus 5,000 m3/day (1.32 MGD). Thus, the process flow calculations resulted in a total backwash water volumetric flow rate of approximately 38,400 m3/day (10.1 MGD) assuming 10 GMF units was sufficient for the 50 MGD facility.

**Table S1.** Summary of engineering operational parameters for a 50 million gallons per day (MGD) seawater reverse osmosis (SWRO) plant with conventional granular media filtration (GMF pretreatment systems [2,48].

| **Design Parameter** | **Practical Value** |
| --- | --- |
| Filtration Rate (HLR–m/hr) | 10 |
| Areal Footprint of One Unit (m2) | 192 |
| Number of Filters in Operation | 8 |
| Filter Run Time (hrs) | 24 |
| Ratio Backwash Rate: Filtration Rate | 5 |
| Backwash Time (min) | 30 |
| Filtered Volume (Q)/hr/unit (m3) | 9,600 |
| Total Volume of Water Consumed during Backwash Operation (m3) | 38,400 |

Similar process design calculations were conducted for pressurized GMF systems for a 50 MGD plant operating at a theoretical intake rate of 100 MGD (Table S2). Pressurized systems would be expected to operate at a HLR of 25 m/hr with a much smaller areal footprint than conventional GMF systems, leading to a higher number of filters in operation (24 filters total, 2 for redundancy during backwashing). The required volume of water to backwash these units was calculated to be 12,441 m3/day (3.29 MGD), approximately three times less than conventional GMF systems (Table S2).

**Table S2.** Summary of engineering operational parameters for a 50 MGD SWRO with pressurized GMF pretreatment systems [2,48].

| **Design Parameter** | **Practical Value** |
| --- | --- |
| Filtration Rate (HLR–m/hr) | 25 |
| Areal Footprint of One Unit (m2) | 28 |
| Number of Filters in Operation | 22 |
| Filter Run Time (hrs) | 24 |
| Ratio Backwash Rate: Filtration Rate | 4 |
| Backwash Time (min) | 30 |
| Filtered Volume (Q)/hr/unit (m3) | 1,131 |
| Total Volume of Water Consumed during Backwash Operation (m3) | 12,441 |

1.2 Microfiltration/Ultrafiltration (MF/UF) Process Flow Calculations

The estimated volume of water consumed per day for the pressurized UF system depended on the specifications of the manufacturer and reported practical experience from pilot testing of pressurized UF systems (Table S3) [48]. This study used UF system parameters given by Norit (Pentair X–Flow) Seaguard SXL 225 systems, with hollow fiber PES membranes of 0.02 to 0.025 µm pore sizes and operating in an inside out configuration. These systems have 40 m2 surface area per membrane module. Each pressure vessel houses 4 membrane modules in a horizontal configuration and 48 vessels are configured per train. We considered that the Norit system would be operating at a median pressure of 1 bar and a design flux (from pilot testing) of 65 L/m2/hour and a filter run time of 75 minutes. To meet this design flux, 6 percent standby capacity was incorporated for one train to be offline for backwashing and another potentially offline for cleaning purposes. Incorporating this standby capacity resulted in an average flux of 64 L/m2/hour. From the average flux, backwash rate, backwash time, and frequency, a total of 50,505 m3/day (13.3 MGD) of water was estimated to be used for UF backwashing purposes alone (Table S3).

**Table S3.** Summary of engineering operational parameters for a 50 MGD SWRO with pressurized SWRO ultrafiltration pretreatment systems [2,48].

| **Design Parameter** | **Practical Value** |
| --- | --- |
| Average Flux (L/m2/hr) | 64.2 |
| Total Membrane Area Required (m2) | 245,760 |
| Number of Modules Required | 6,435 |
| Number of Vessels Required | 1,609 |
| Number of Trains | 34 |
| Filter Run Time (min)1 | 75 |
| Ratio Backwash Rate: Filtration Rate | 10 |
| Backwash Time (min) | 1 |
| Backwash cycles/day 2 | 19 |
| Total Volume of Water Consumed during Backwash Operation (m3) | 50,505 |
| Pressure Loss (TMP) (bar) | 1 |

1 Taken as median value presented *in [48];* 2 Calculated based on a 24–hour period.

The vacuum driven submerged UF system was based off a design using GE Zenon ZeeWeed 1000 V–3 model and practical experience of a pilot testing of this product [48]. The Zenon ZeeWeed product is a hollow fiber membrane system operating with outside in configuration. The operating pressure of this system, 0.4 bar, was assumed to be much lower than the standard operating pressure for comparison purposes with the pressurized membrane systems. Voutchkov [47] stated that operating submerged vacuum systems during algal bloom periods at 0.4 bars resulted in half of the run time of normal systems. If we assume that the run time of the submerged systems were identical to pressurized systems, then the run time of this system would be 37.5 minutes, increasing the backwash frequency to 38 times per day (Table S4). From a design flux of 40 L/m2/hr, a total of 7,148 membrane modules are required along with 149 cassettes (48 modules per cassette) and 30 tanks (assuming each tank houses 5 cassettes). The resulting water usage for backwash processes is approximately double the usage of pressurized systems at 101,010 m3/day (26.7 MGD) (Table S4).

**Table S4.** Summary of engineering operational parameters for a 50 MGD SWRO with submerged SWRO UF pretreatment systems [2,48].

| **Design Parameter** | **Practical Value** |
| --- | --- |
| Average Flux (L/m2/hr) | 40 |
| Total Membrane Area Required (m2) | 394,571 |
| Number of Modules Required | 7,148 |
| Number of Cassettes Required | 149 |
| Number of Tanks | 30 |
| Filter Run Time (min)1 | 37.5 |
| Ratio Backwash Rate: Filtration Rate | 10 |
| Backwash Time (min) | 1 |
| Backwash cycles/day 2 | 38 |
| Total Volume of Water Consumed during Backwash Operation (m3) | 101,010 |
| Pressure Loss (TMP) (bar) | 0.4 |

1Taken as median value presented in *[48]*;  2 Calculated based on a 24–hour period

2. Identification of Algal Blooms and Total Toxic Algal Cell Concentrations in the Desalination Intake

Field data collected and posted to the Southern California Ocean Observing System (SCOOS, http://www.sccoos.org/) database were used to identify the pattern and intensity of algal blooms. Specifically, we compiled chlorophyll–a, dissolved domoic acid, as well as algal cell concentrations for the following algae: *Akashiwo sanguinea*, *Alexandrium sp., Prorocentrum sp., Dinophysis sp., Lingulodinium polyedrum, Pseudo–nitzschia delicatissima* size classand *Pseudo–nitzschia seriata* size class from a three–year period (2012–2015).

The monitoring data for chlorophyll–a was first used as a surrogate for identifying algal blooms, where prolonged periods with chlorophyll–a levels > 12 µg/L (the mean across the 3–year period) were identified as blooms. From this analysis, eight distinct bloom periods of varying duration were observed at the Santa Monica Pier (Figure S1). We have noted that even if the chlorophyll concentration is elevated, it does not directly imply an elevation of toxin producing algae in water. Nontoxic blooms have been known to frequent the region and are generally associated with non–toxic species of the genus *Prorocentrum* (*Prorocentrum micans*) [1]*.*

To identify the toxic blooms, domoic acid weekly concentrations reported by SCCOOS were analyzed over the same three–year period to assess the blooms that were dominated by *Pseudo–nitzschia sp.* (Figure S1). Several large spikes of DA were observed in late spring and early summer months and corresponded with some algal bloom periods identified by chlorophyll (more notably Bloom 4). Generally, DA concentrations were observed to peak right at the onset of some bloom periods. Correlation between the bloom period and the presence of DA suggests that these bloom periods (1 and 4) were dominated by *Pseudo–nitzschia* species.

**
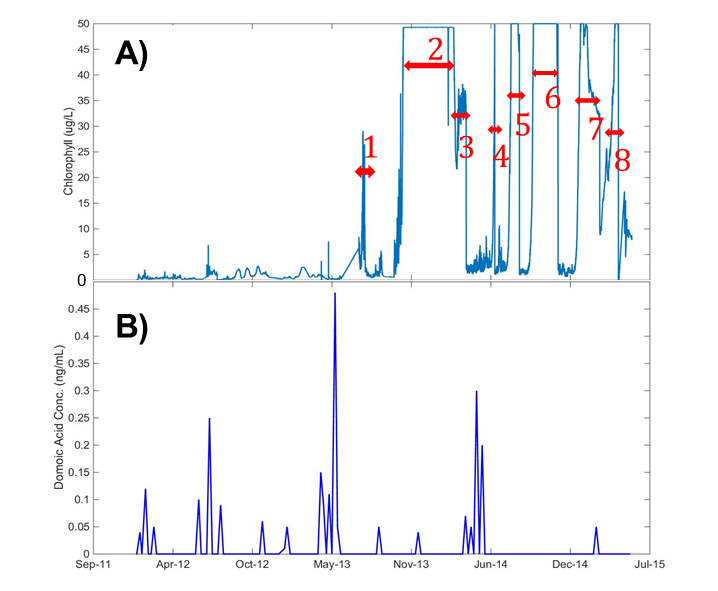
**

**Figure S1.** A) Chlorophyll and B) Domoic acid concentrations over a three–year period at the Santa Monica Pier (2012–2015).

The marine algal species and concentration at the Santa Monica location was then compiled over the course of three years for each distinct bloom period (Figure S2). Figure S2 portrays the average logarithmic cell concentration for each of eight respective bloom periods.

**
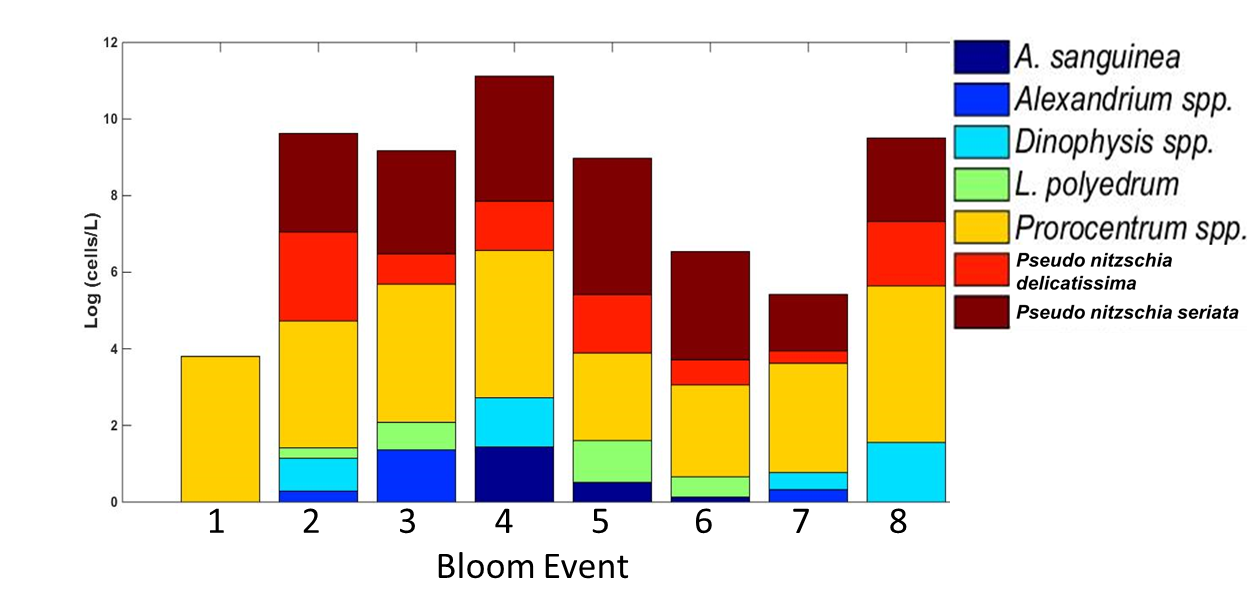
**

**Figure S2.** Average cell concentration for all monitored algal species during eight identified algal blooms at the Santa Monica Pier between 2012 and 2015. The timing of the eight algal blooms is indicated in Figure S1.

Of the different algal species reported, only some species of *Alexandrium* (producer of Saxitoxin, STX), *Dinophysis* (producer of Okadaic acid, OA), *Lingolidinium polyedrum* (producer of Yessotoxin, YTX), and *Pseudo–nitzschia* (producer of domoic acid, DA) are known to produce toxins [11]. Therefore, only those toxic species and their associated toxins DA, STX, OA, and YTX were included in the pMFA. The toxic effects of each toxin are presented below and their health effects are summarized in Table S5.

DA is an amino acid derivative of the kainoid class of compounds that is associated with amnesic shellfish poisoning (ASP) [1]. The most common route of human exposure to DA is through ingestion of contaminated shellfish. The acute health effects include short term memory loss, gastroenteritis (vomiting, stomach pains, cramps), and neurological symptoms such as confusion, disorientation, seizures, and in some cases, death [9]. ASP is also a serious threat to marine wildlife as there have been reports of more than one thousand deaths and/or intoxication episodes of marine mammals or sea birds, especially off the coast of California [10,11].

STX is one of the most powerful toxins comprising most marine algal blooms and possibly one of the most toxic poisons on earth other than some select venoms and bacterial toxins [12]. STX is classified in the group of paralytic shellfish poisons (PSPs) in that consumption (either through food or drinking contaminated water) can lead to severe, acute health effects such as gastro–intestinal symptoms, paralysis, and in the worst cases, death [1,13]. These toxins have also been associated with marine wildlife mortalities, affecting species of fish, marine mammal, and seabird populations [14–16]. However, no unusual animal mortality has been recorded from STX off the California coast [17].

OA is classified as a diarrhetic shellfish poison (DSP) due to the acute symptoms it causes in humans including gastrointestinal inflammation, abdominal pain, and diarrhea [18]. OA has also been observed to be tumor forming, although there is no specification of whether OA is cancerous to humans as no chronic health effects have been studied or reported in the published literature [19,20]. There have been no documented cases of DSP poisoning from OA on the West Coast, but analysis of shellfish tissue from established monitoring programs has indicated the presence of OA in shellfish found throughout the region [1].

YTX has been commonly classified as a DSP since it was observed in the natural environment with other DSP toxins, but some studies have shown that it does not produce these gastrointestinal effects in the human body [5,21]. In fact, the human health effects of YTX, both acute and chronic, are not yet fully understood [22]. Other studies have suggested that YTX is a potent cardiotoxin, while others have shown that YTX targets the lysosomes, immunes system, and the thymus of the human body [23,24].

**Table S5.** Summary of Human Health Effects of Various Algal Toxins Endemic to Southern California1

| **Toxin** | **Classification** | **Exposure Route** | **Acute Symptoms** |
| --- | --- | --- | --- |
| Domoic Acid | Amnesiac Shellfish Poison (ASP) | Contaminated Shellfish/Fish, Recreation, Desalinated Drinking Water | Gastroenteritis (vomiting, stomach pains, cramps), memory loss, confusion, disorientation, seizures, and death |
| Saxitoxin | Paralytic Shellfish Poison (PSP) | Contaminated Shellfish/Fish, Recreation, Desalinated Drinking Water | Gastrointestinal symptoms, paralysis, death |
| Okadaic Acid | Diarrhetic Shellfish Poison (DSP) | Contaminated Shellfish/Fish, Recreation, Desalinated Drinking Water | Gastrointestinal inflammation, abdominal pain, and diarrhea (potentially carcinogenic) |
| Yessotoxin | Diarrhetic Shellfish Poison (DSP)2 | Contaminated Shellfish/Fish, Recreation Desalinated Drinking Water | Not fully understood (studies report gastrointestinal symptoms and cardiotoxicity) |

1 Information is summarized from following references *[1,9,12,13,18–20,22–24]*; 2Some studies report that Yessotoxin is not toxic to humans *[5,21].*

Cell concentration data as summarized in Figure S2 was used to derive a probability distribution as input to the pMFA. The visual inspection of the histograms of the cell concentrations (Figure S3) indicated that the cell distributions appeared to be nonparametric and not suitable to fit to any parametric statistical distribution (i.e. normal, gamma, beta, etc.). In addition, the number of observations for each species was relatively low over the three–year period, given that only bloom conditions were considered, further hindering the use of parametric probability distributions. Therefore, a nonparametric estimate of the empirical cumulative probability distribution (ECDF) was applied in this study.


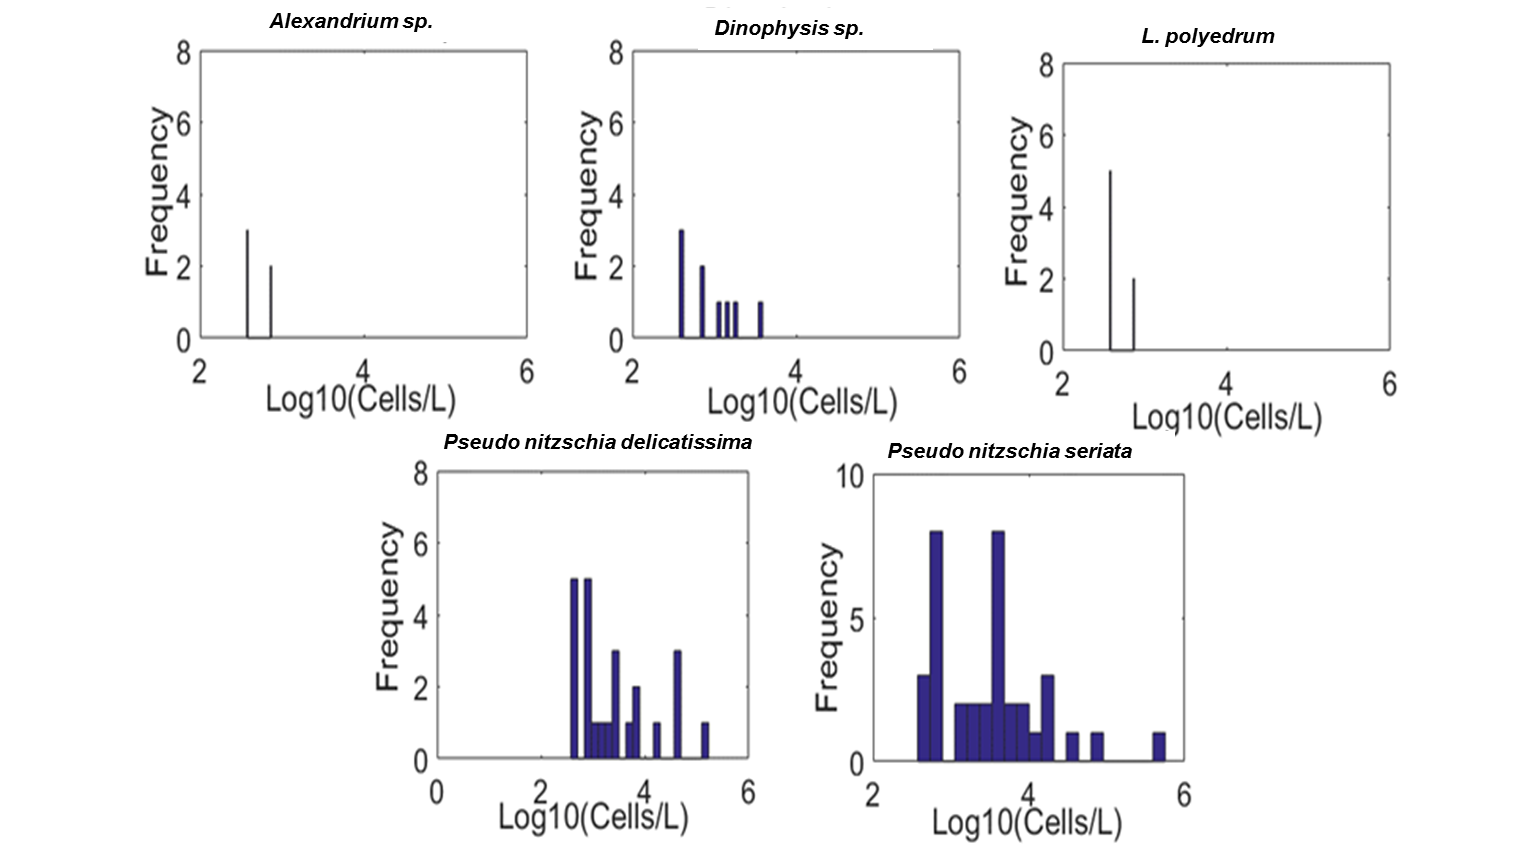


**Figure S3.** Histograms of the cell distributions of each algal species over a three–year period.

Nonparametric estimates of the CDF were achieved by linearly interpolating the stair step function of the ECDF through the breakpoints located at the midpoints of each characteristic jump (Figure S4). The ECDF was then inverted to obtain a plot of the ECDF output probability (x–axis) plotted against the logarithm of the cell concentration (y–axis). Thus, a uniform random number generator was used to select a number between 0 and 1, which was then applied in the inverse ECDF to randomly select a cell concentration, taking the full probability of the observations into account. As observed in Figure S4, algal species with fewer observations have a steeper inverse ECDF as compared to algal species with a larger amount of observations and the probability distribution is much narrower.


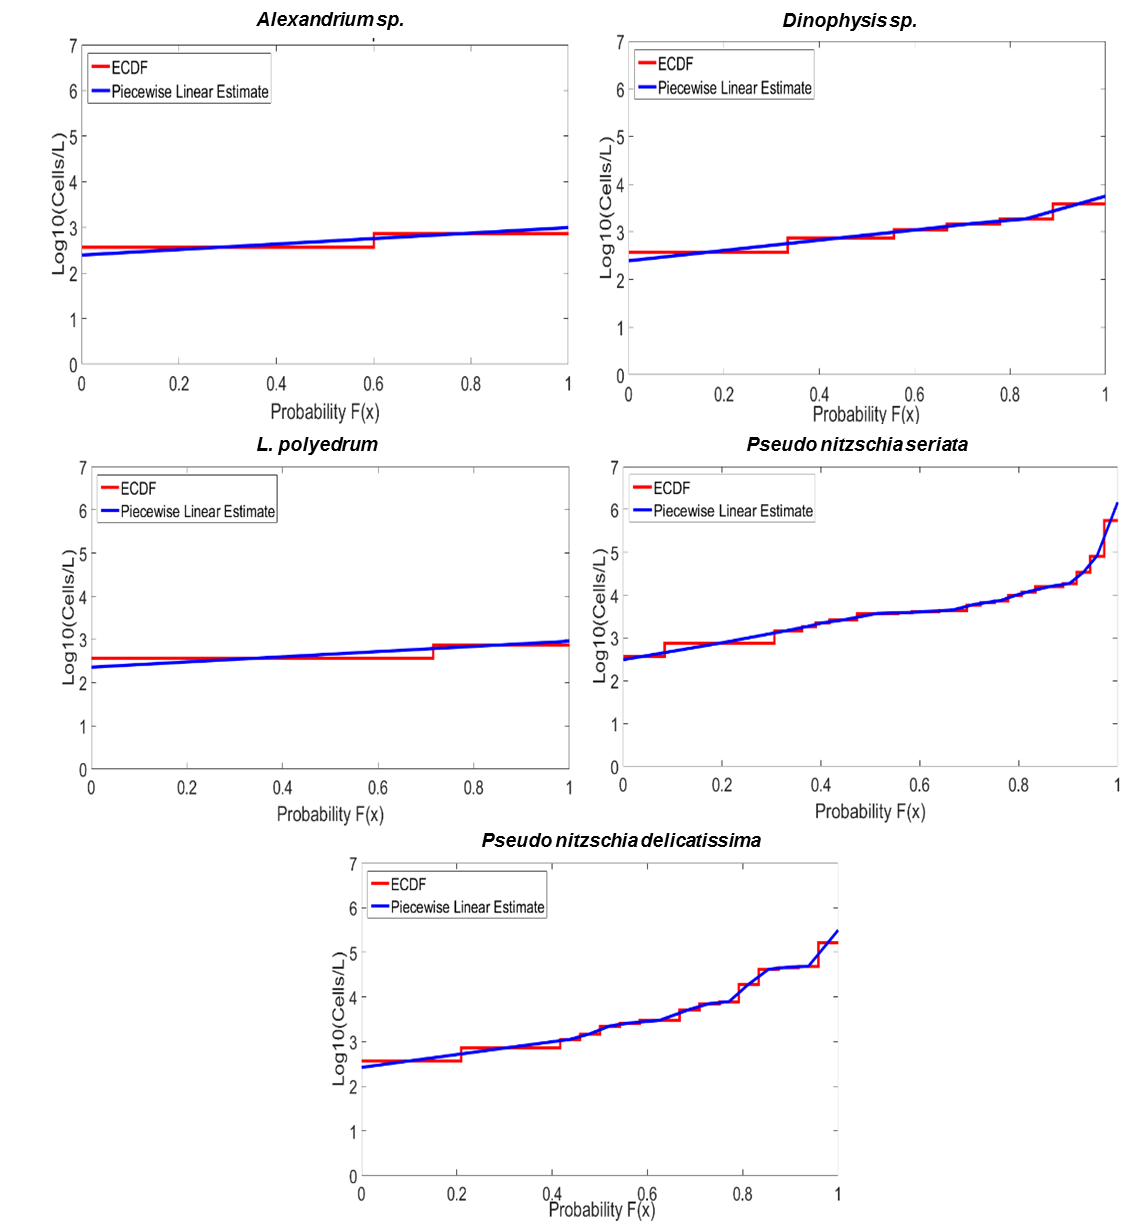


**Figure S4.** Inverse cumulative probability distribution (CDF) Plots for all algal species. The red line is the stair step function of the empirical cumulative probability distribution (ECDF), whereas the blue line is the piece wise linear interpolation of the ECDF.

3. Estimation of Dissolved Marine Toxin Removal

3.1 Physical and Chemical Properties of Algal Toxins

Information on dissolved marine algal toxin removal through water treatment processes is sparse in comparison with the removal of algal cells containing the intracellular toxins for most conventional process [2]. To understand the removal efficiency of these toxins, the properties of marine toxins were compared with the cyanotoxin microcystin–LR (MC–LR), a well–studied algal toxin present during most cyanobacterial harmful algal blooms (confined to fresh and some brackish waters). Figure S5 shows the molecular structure of the four marine toxins together with MC–LR.

DA consists of a tricarboxylic amino acid parent group (three carboxyl groups) with one secondary amino group (Figure S5A). All four groups are charged at neutral pH (Figure S5A). The secondary amino group is generally positively charged, whereas the carboxylic acid groups contribute to a net negative charge of the compound. Protonation as the pH increases yields five different protonated isomers of DA including isodomoic acid A–H and the domoic acid 5’–distereomer [3].

STX consists of a tricyclic core that is very rigid and stable in most environmental solutions, similar to the hepatotoxins common to the *Microcystis* genus (Figure S5B). Two amino groups exist at either side of the cyclic structure, which impart a net positive charge at neutral pH of 7.7 [4].

YTX is rather complex, but consists of a series of cyclic polyether structures (11) that compose a ladder–like formation. YTX molecules are disulfated at one end of the structure, which counteracts the lipophilic nature of the ether structure, lending to an amphoteric behavior [5] (Figure S5C).

OA consists of a monocarboxylic group attached to a linear chain of polyether structure (hence it is a monocarboxylic acid, Figure S5D). OA can be observed in natural water samples in a polar and non–polar (esteric) form. At neutral pH, one can expect OA to be relatively water soluble due to the presence of a carboxylic acid (anionic charge) [6].

MC–LR is a monocyclic heptapeptide in that it consists of seven amino acids in a ring–like structure, which impart a large stability in most environmental conditions [7]. MC–LR is a structural variant of the group of MC toxins, which has a leucine (L) and arginine (R) amino acid in the second and fourth amino acid position of the ring structure (Figure S5E). Two ionizable carboxylic acid groups on D–glutamate and D–erthyro–β–methylaspartic acid as well as one ionizable amino on the arginine group contribute to MC–LR’s high water solubility [8]. In addition, the ADDA group attached to MC–LR’s ring structure is relatively hydrophobic, which contributes to an appreciable solubility in organic solvents.


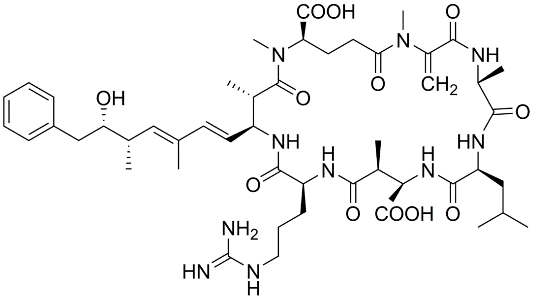


**E)**


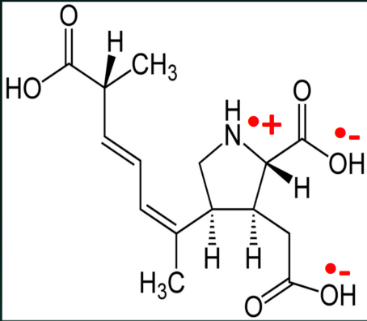

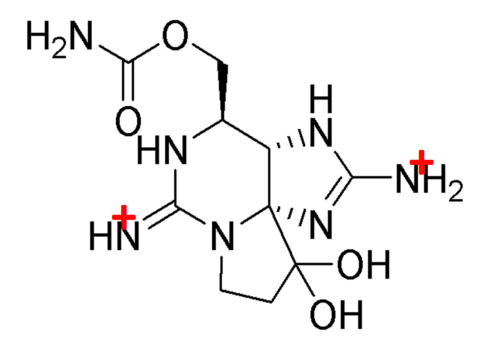

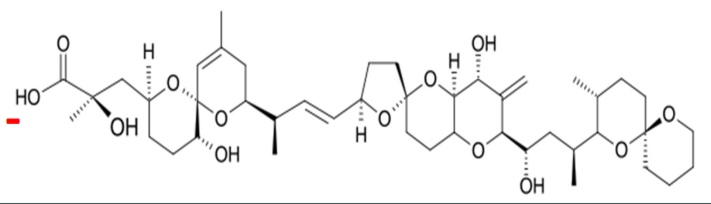

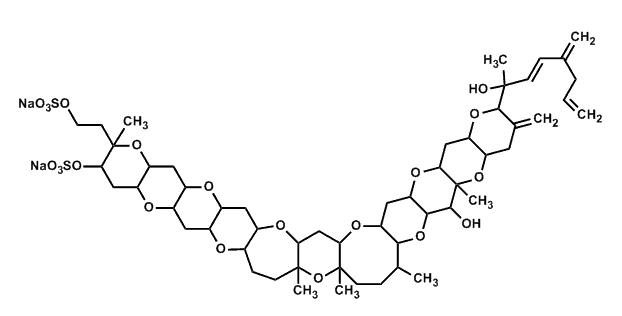


**C)**

**A)**

**B)**

**NH**

**NH2**

**D)**

**Figure S5.** Molecular structure of the common marine toxins a) Domoic acid, b) Saxitoxin, c) Yessotoxin, d) Okadaic acid, and e) Microcystin–LR

The comparison of molecular structures provided insights to the physical and chemical properties of each marine toxin in terms of the water solubility and adsorption characteristics. Information summarized in Table S6 revealed that all toxins are chemically stable and heat resistant at operational pH (7–9). MC–LR, STX, and DA are considered hydrophilic compounds, whereas OA and YTX are lipophilic. All of the compounds are polar, to varying degrees. The majority of the compounds possess net negative charges (MC–LR, DA, OA, YTX), which vary in strength due to the presence, protonation, and de–protonation of certain functional groups (i.e. amino, carboxylic acid, etc.) as a function of pH and ionic strength (i.e. presence of sodium and chloride ions) of the water, as discussed in the previous section. Only the STX toxins are net positively charged at operating pH, due to the presence of two amino functional groups.

To quantitatively assess both the water solubility and potential sorption characteristics of the marine toxins, the partition coefficient (LogKOw) and distribution coefficients (LogDOw) were compared to that of MC–LR (Table S6). In general, the LogDOw is more predictive than the LogKOw because it depends on the pH of the solution and considers the ionization potential of compounds in solution [26]. Species with LogDOw values < 1 are considered strongly lipophilic and are more likely dissolved in non–polar solvents, absorbed in fatty tissues, or adsorbed onto organic matter present on soils [26, 27]. A majority of the distribution coefficients presented in Table S6 were experimentally determined. As compared to predictions based on the molecular structure, a greater confidence was vested in the experimentally derived values [28]. The distribution coefficients also were presented for a pH range of 7–8.5 for all studies, which was similar to that expected during the operation of a SWRO facility. Based on the trends in the LogDOw, the water solubility for the toxins from highest water solubility to lowest water solubility was summarized as follows: STX> DA>MC–LR>OA>YTX. Although YTX appeared to be more polar than OA (based on chemical structure alone), experimental results suggested otherwise [28].

The more water–soluble compounds are expected to be removed sparingly from conventional treatment processes such as conventional coagulation, flocculation (C/F), and GMF [29]. This is due to the fact that the predominant negative charge of these molecules resists charge neutralization of traditional coagulants. Further, the small molecular size of dissolved toxins may hinder the formation or adherence to flocs of appreciable density to be removed by gravitational settling, especially at the low hydraulic retention times used in conventional practice. Moreover, the presence of natural organic matter (NOM) or algal organic matter will most likely consume most of the coagulant dosage, especially at practical operational doses [30]. Studies have shown that even at large coagulant additions to promote sweep flocculation, complete removal of the dissolved fraction of MC–LR was not achieved [30]. Thus, since large doses of coagulants (to promote sweep flocculation) are not practical from an operational and economical viewpoint, we can expect the removal of most marine toxins to be relatively small from conventional C/F processes alone. STX may prove to be an exception to this inference during certain conditions of C/F. For example, alkaline conditions and the presence of oxygen may favor the transformation of STX into less toxic components, and may, to some extent, be removed by conventional C/F processes [13].

The partition between octanol and water for MC–LR has been studied as a function of pH and is a significant factor controlling the fate and transport in soil (conventional GMF) and near surfaces/boundary layers of membranes (MF/UF) [31, 32]. The soil in most conventional granular media filtration systems will contain an appreciable amount of organic material and biomass on the surface that cannot be removed by backwashing, especially near the top layers of the filter media [33]. Similarly, MF/UF practices create a cake layer due to compression of and breakage of algal cells as a result of high transmembrane pressures [34, 35]. When assuming the LogDOw as the main factor for sorption behavior on soils and/or hydrophobic membranes, then an approximate trend in the adsorption potential to soil (GMF) or hydrophobic membranes from highest to lowest can be summarized as follows: YTX>OA>MC–LR>DA> STX.

**Table S6.** Summary of Physico–Chemical Properties of Marine Algal Toxins

| Toxin | MW a  (g/mol) | Water Solubility | Other Observations | Charge @ Operat. pH, Net Chargeb | B. P.  (ºC)c | pKa | LogKOw | LogDOw | Kd/Kf  (L/g) |
| --- | --- | --- | --- | --- | --- | --- | --- | --- | --- |
| STX | 299 | Soluble | High oxidative degradation potential, unstable under alkaline pH | Polar, + | 693 | 8.22, 11.281 | –4.532 | –5.4922 | 6.9E–073 |
| DA | 311.3 | Soluble | Crystalline, acidic at neutral pH | Polar, – | 321 | 2.1,3.72,4.93,9.824 | –2.434 | –2.394 | 2.635 |
| MC–LR | 995.17 | Soluble | Cyclic structure, extremely stable | Polar, – | N/A | 2.09, 2.19, 12.486 | 0.2486 | –1.556 | 0.01167 |
| OA | 805 | Slightly soluble | Lipophilic, potential to bioaccumulate | Polar, slight – | 921.6 | 4.98 | 1.648 | 0.0368 | N/A |
| YTX | 1187.3 | Slightly soluble | Lipophilic, potential to bioaccumulate | Polar, slight – | N/A | 6.98 | 4.578 | 3.268 | N/A |

a,c Adapted from *[36];* b Operational pH for seawater was assumed to range between 7 and 8.5, charge of dominant ionized species; 1 Experimentally determined by *[37];* 2 Predicted by ACD/Labs from Molecular Structure, pH 7.4; 3 Experimentally determined by *[38]*, Santa Barbara sediments, saltwater; 4 Experimentally determined by *[39]* 5 Experimentally determined by *[40]*, Santa Barbara sediments, saltwater; 6 Experimentally determined by *[31]*, extrapolated values at pH 8.46; 7 Experimentally determined by *[41]* for slow sand filter material, freshwater; 8 Experimentally determined by *[28]*, extrapolated values at pH 8.81; N/A Not available in the literature.

3.2 Removal Coefficient for MC–LR as a Reference

To set the reference removal coefficient, we determined the removal ranges of dissolved MC–LR from the literature for both GMF and MF/UF processes (Figure S6). Data mining results showed that MC–LR removal efficiencies varied over a wide range, but were lower for GMF as compared to MF/UF processes. Since the reports did not clearly separate the processes with or without coagulation pretreatment, we assumed that the lower interquartile range corresponded to removal efficiencies without coagulation; and the upper interquartile ranges represent processes with coagulation (Figure S6). This assumption was justified by experimental reports on improvement of dissolved toxin removal with coagulation [30,42–44].


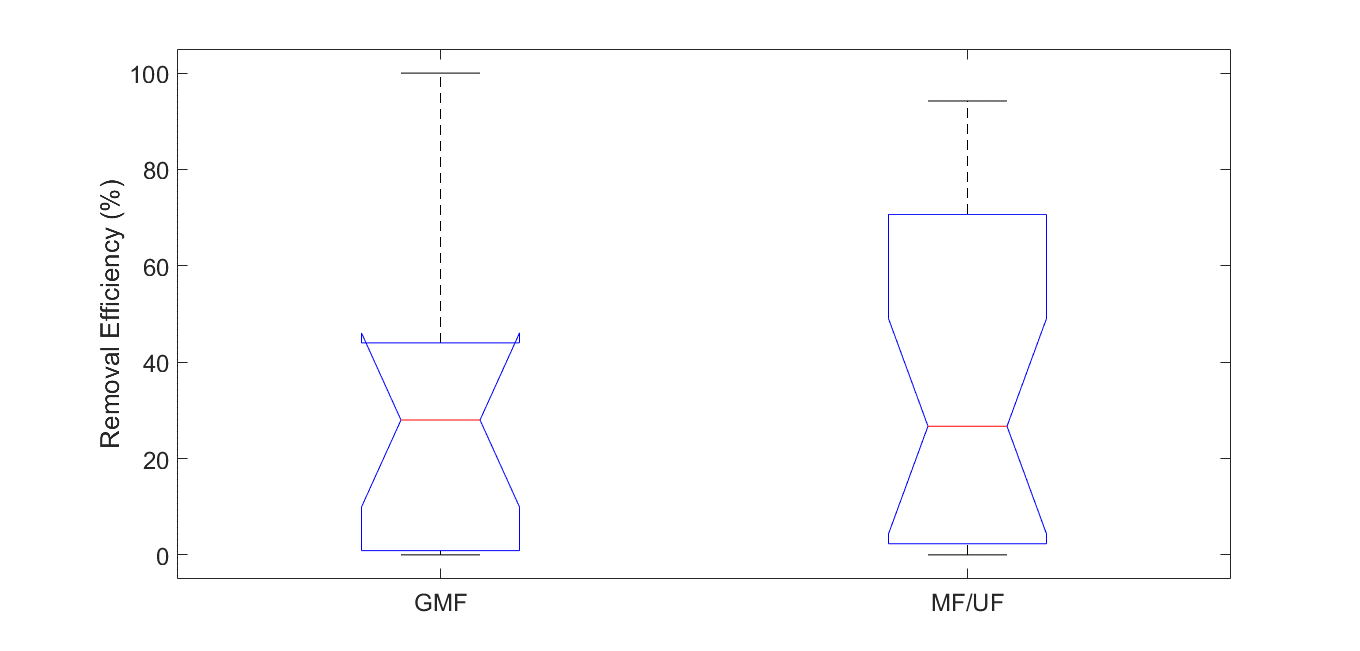


W/COAG

No COAG

W/COAG

No COAG

**Figure S6.** Summary of reported removal efficiencies of dissolved cyanotoxin microcystin–LR (MCLR) [44,46,54–62].

3.3 Dissolved Toxin Removal Coefficients by GMF Systems

The ranges in each dissolved marine algal toxin removal were developed from the relative similarity or differences in physical chemical properties to MC–LR and the expected removal mechanisms within the treatment system. Two main mechanisms: electrostatic interactions (chemical adsorption) and phase partitioning of the toxin (based on logDOw), contribute to the removal of dissolved toxins during GMF. We assumed that the physical mechanisms of retention, such as straining, interception, or impaction did not apply as the dissolved toxins have a very small molecular weight. Similarly, diffusive or dispersive processes were neglected due to the high operational interstitial velocities employed by most pretreatment filtration processes.

Electrostatic interactions may occur between the charged functional groups of each toxin at operational pH (7.7–8) and the media surface. In most cases, the filter media will have organic matter previously attached to the surface and not completely removed by backwashing processes [33]. This organic matter consists of weak organic acids that become deprotonated within the operational pH range and contribute to a net negative charge. Therefore, toxins with a net positive charge, such as STX, may chemically sorb to the media surface, whereas other toxins that are net negatively charged may become repelled. Other factors such as the strength of the net charge of functional groups may affect the sorption potential. Taking these factors into account, the relative ranking in potential removal by electrostatic interactions is as follows: STX>DA>MC–LR>YTX>OA.

The above trend is confirmed by experimental studies that have reported the adsorption coefficients for the toxins of interest onto natural beach sediments or quartz sands [38, 40, 41]. A low relative adsorption potential of MC–LR was observed in both batch and column engineering filtration studies in the laboratory [41, 45]. However, STX demonstrated a much higher adsorption potential than both DA and MC–LR onto natural beach sediments (in artificial seawater, neutral pH), due to the increased electrostatic interactions between positively charged functional groups and either the sediments surface (negative charge) or the organic matter present on the surface (negative charge) (Figure S7) [38,40].

**Figure S7.** Adsorption isotherms for different algal toxins onto natural sediments (graph is based on data reported in [38,40])

Regarding phase partitioning, the relative ranking from most hydrophobic to most hydrophilic was determined as: YTX>OA>MC–LR>DA> STX. This ranking does not reflect electrostatic interactions, which may potentially outweigh the potential for phase partitioning. Longer chain, lipophilic toxins such as YTX and OA would be more affected by phase partitioning removal mechanisms, while the smaller and hydrophilic toxins, DA and STX, would depend much more on electrostatic interactions (chemical adsorption) between the organic matter present in GMF systems and the charged functional groups. Therefore, the ultimate removal in GMF systems, weighted by physical chemical properties of the toxins and proposed mechanisms of removal, is as follows: STX>YTX>OA>MC–LR>DA. STX exhibits the highest removal due to the relatively strong, net positive charge, whereas YTX and OA are likely to partition to organic matter on the filter media due to the high distribution coefficients at operational pH. DA is most likely repelled by the net negative charge of the organic matter, and due to its small molecular weight is the toxin rejected the most by GMF systems.

The final dissolved marine toxin removal ranges in GMF processes follow the trend postulated above and in reference to MC–LR is shown in Table S3. As evidenced in the table, the lower and upper limit of the ranges in dissolved MC–LR removal were adjusted by an increment of 2% based on the trend in removal predicted. A value of 2% was chosen as an increment as a conservative estimate of the change in the expected removal efficiency. Coagulation based processes have the potential to remove a greater extent of dissolved toxins and were given the highest range in removals for all treatment processes. Both pressurized and conventional GMF processes without coagulant addition had relatively similar ranges in dissolved toxin removal, although pressurized systems were slightly higher than conventional systems (Table S7).

**Table S7.** Summary of removal efficiencies for dissolved marine toxins in GMF treatment systems.

| **Treatment Process** | **MC–LR**  **(%)** | **DA**  **(%)** | **OA**  **(%)** | **YTX**  **(%)** | **STX**  **(%)** |
| --- | --- | --- | --- | --- | --- |
| No Coag | 0.9–28 | 0–27.1 | 2.9–30 | 4.9–32 | 6.9–34 |
| Pressurized, No Coag | 8.6–34 | 6.6–32 | 10.6–36 | 12.6–38 | 14.6–40 |
| W/Coag | 28–44 | 26–42 | 30–46 | 32–48 | 34–50 |

3.4 Dissolved Toxin Removal Coefficients by MF/UF Systems

The main mechanisms for dissolved solutes removal during membrane filtration processes include size exclusion, electrostatic interactions, phase partitioning, and diffusion [46]. Although the major rejection mechanism of most dissolved solutes is through physical sieving or size exclusion alone, the molecular weight cutoff (MWCO) of all MF or UF membranes (0.1 to 0.02 µm) is considerably larger than the molecular weight of all marine algal toxins. Therefore, size exclusion should be ruled out as a major removal mechanism.

During algal blooms, the accumulation of organic matter at the MF/UF membrane surface is inevitable due to the transmembrane pressures employed and associated cell breakage [47]. The relative thickness and development of this organic fouling layer depends on the membrane surface properties such as hydrophobicity, roughness, and charge [46]. Thus, similar to the GMF process, the same two main mechanisms: electrostatic interactions and phase partitioning, are responsible for dissolved marine toxin removal in MF/UF. An equivalent trend in removal proposed for GMF systems is also applied to MF/UF systems: STX>YTX>OA>MCLR>DA.

To be consistent with GMF systems, an increment of 2% was added or subtracted from the higher and lower boundaries of each range from the reference toxin MC–LR removal range (Table S8). In general, MF/UF processes with coagulation were observed to have a much higher removal of extracellular toxins than processes without coagulation (Table S8). In this study, dissolved toxin removals were assumed to be comparable for MF/UF configurations (i.e. pressurized vs. submerged).

**Table S8.** Summary of removal efficiencies for dissolved marine toxins in MF/UF treatment systems.

| **Treatment Process** | **MC–LR (%)** | **DA  (%)** | **OA  (%)** | **YTX  (%)** | **STX  (%)** |
| --- | --- | --- | --- | --- | --- |
| No Coag | 2.3–26.7 | 0.3–24.7 | 4.3–28.7 | 6.3–30.7 | 8.3–32.7 |
| W/Coag | 26.7–70.7 | 24.7–68.7 | 28.7–72.7 | 30.7–74.7 | 32.7–76.7 |

3.5 Dissolved Toxin Removal Coefficients by RO Systems

Pore size exclusion was identified as the primary removal mechanism of RO membranes for most molecular compounds, although the relative hydrophobicity and membrane material may influence the formation of boundary layers/concentration polarization and biological fouling [48]. The size exclusion range of most RO membranes is 0.6 to 0.7 nm and the molecular weight cutoff is generally 100–300 Daltons [49]. Similar to MF/UF membranes, RO membranes can be either negatively charged (hydrophilic) or positively charged (hydrophobic).

Complete removal of YTX (1000 Da) and OA (>800 Da) are expected based on the RO size exclusion mechanism alone [36]. These theoretical predictions were confirmed in a variety of laboratory and pilot scale studies, assessing the removal efficiency of OA in the feed and permeate water [50, 51] (Table S9). However, removal of YTX by RO membranes, to the best of our knowledge, has not been presented in the published literature.

Prediction of RO rejection for the smaller toxins, STX and DA (~300 Da), is much more complex and depends on several factors such as the condition of the membrane surface, as well as the ionic strength, and pH of the feed water [36]. Increased biological or organic membrane fouling may lead to increased DA rejection due to formation of chemical bounds with the carboxylic acid group on DA. Physical adsorption of STX may occur due to the hydrophilic properties of the membrane (negative charge), leading to increased rejection. Despite these complications in prediction ability during RO removal of the smaller toxins, laboratory and pilot scale studies have indicated that the removal of STX and DA ranges between 99.4–>99.9 and 99.0 to >99.9 % removal for each toxin, respectively (Table S9).

**Table S9.** Summary of RO rejection of dissolved marine toxins.

| **Scale** | **Dissolved % Toxin Removal** | | | | | **Reference** |
| --- | --- | --- | --- | --- | --- | --- |
| **STX** | **PbTX** | **DA** | **OA** | **YTX** |
| Lab | 99.4 | 99.9 | 99.0 | 99.7 | N/A | [50] |
| Lab | >99.9 | >99.9 | >99.9 | >99.9 | N/A | [51] |
| Pilot1 | >99.9 | >99.9 | >99.9 | >99.9 | N/A |
| Pilot1 | >99.9 | | | | | [42] |
| Pilot2 | 99.8 | | | | |

N/A = Not reported, 1Proceeding UF treatment, 2Proceeding slow sand filter treatment

3.6 Ranges in Algal Cell Breakage

The percentage of cells that break during each pretreatment were estimated based on Voutchkov [47], in which 0.4 bars was used as a pressure threshold of significant cell breakage.The transmembrane pressure (TMP, rather than shear) of each pretreatment process at general operational conditions was used to relate the percentage of cell breakage with pressure. With general assumptions of TMP >0.4 bar for pressurized MF/UF and GMF, 0.4 bar for submerged MF/UF and <<0.4 bar for conventional GMF processes, cell breakage was estimated to range between 75–100%, 25–50% and 0–25%, respectively. Coagulation based processes were assumed to decrease the impact of cell breakage for each treatment process.

4. Derivation of Acute Reference Doses for Algal Toxins in Drinking Water

The acute RfDs for STX, DA, and OA were derived from LOAELs of human exposure events, whereas acute RfDs for YTX were established from NOAELs of animal testing (Table S10). The uncertainty factors (UF1) of 3 as used by Paredes and co–workers [52] were applied to extrapolate the LOAEL to NOAEL for STX, DA, and OA toxins (Table S10). To be conservative, an additional uncertainty factor for intra–species variation (UF2) of 3 was used for both STX and OA. The UF2 of 10 was applied to DA; and 3 and 100 (was used for YTX for extrapolation from animal to human data [52]. In all the RfD calculations, a body weight of 70 kg, instead of 60 kg, was used, which is more concurrent with US EPAs quantitative chemical risk assessment framework [53].

**Table S10.** Summary of values and benchmarks used in risk assessments

| **Toxin** | **LOAEL (µg/kg)** | **UF1** | **NOAEL (µg/kg)** | **UF2** | **Acute RfD (µg/kg/d)** | **Acceptable Level (µg/L)** |
| --- | --- | --- | --- | --- | --- | --- |
| STX | 1.71 | 3 | 0.571 | 3 | 0.19 | 3.32 |
| DA | 900 | 3 | 300 | 10 | 30 | 525 |
| OA | 0.714 | 3 | 0.238 | 3 | 0.08 | 1.4 |
| YTX | – | – | 5000 | 3 &100 | 16.7 | 292 |

**II. Supplementary Results**

5. Algal Toxin Concentrations in Difference Sources

5.1 Inlet Toxin Concentration Distributions

The inlet toxin concentration distributions (TCDs) entering the SWRO pretreatment systems varied dramatically by toxin type (Figure S9, STX, DA, OA, YTX). For all pretreatment train scenarios, DA and YTX concentration distributions were much higher (with a mean of 200 and 75 µg/L) than the STX and OA concentration distributions (with a mean of 0.5 and 3 µg/L) (Figure S8). The variability of the influent distributions of DA and YTX, with standard deviation of 11 and 9 µg/L, was also much higher than the influent distributions of STX and OA, with standard deviations of 0.061 and 0.3 µg/L, respectively.


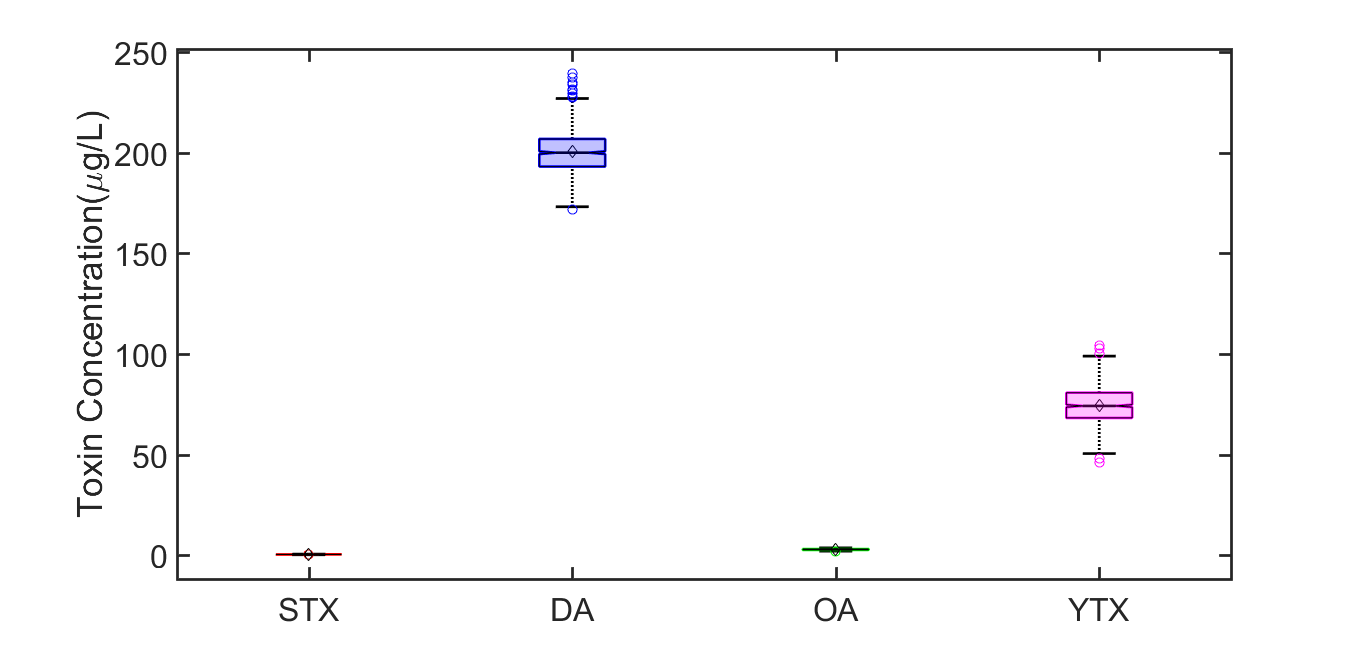


**Figure S8.** Influent toxin concentration distributions for a singular pretreatment train (GMF alone).

5.2 Toxin Concentration Factors in Backwash and Brine Reject

Relative mean toxin concentration factors were calculated by normalizing the model output concentration in the backwash/brine water by the inlet toxin concentrations and compared among pretreatment train configurations (Figure S9). The calculated toxin concentration factors for both backwash and RO rejects ranged from 2 to 10 times the inlet toxin concentrations for all pretreatment train scenarios (Figure S10). STX toxins demonstrated the largest magnitude in concentration factors among all toxin types in this study. Pressurized GMF processes generally produced the higher range in observed toxin concentration factors, whereas processes without coagulation resulted in much lower concentration factors.


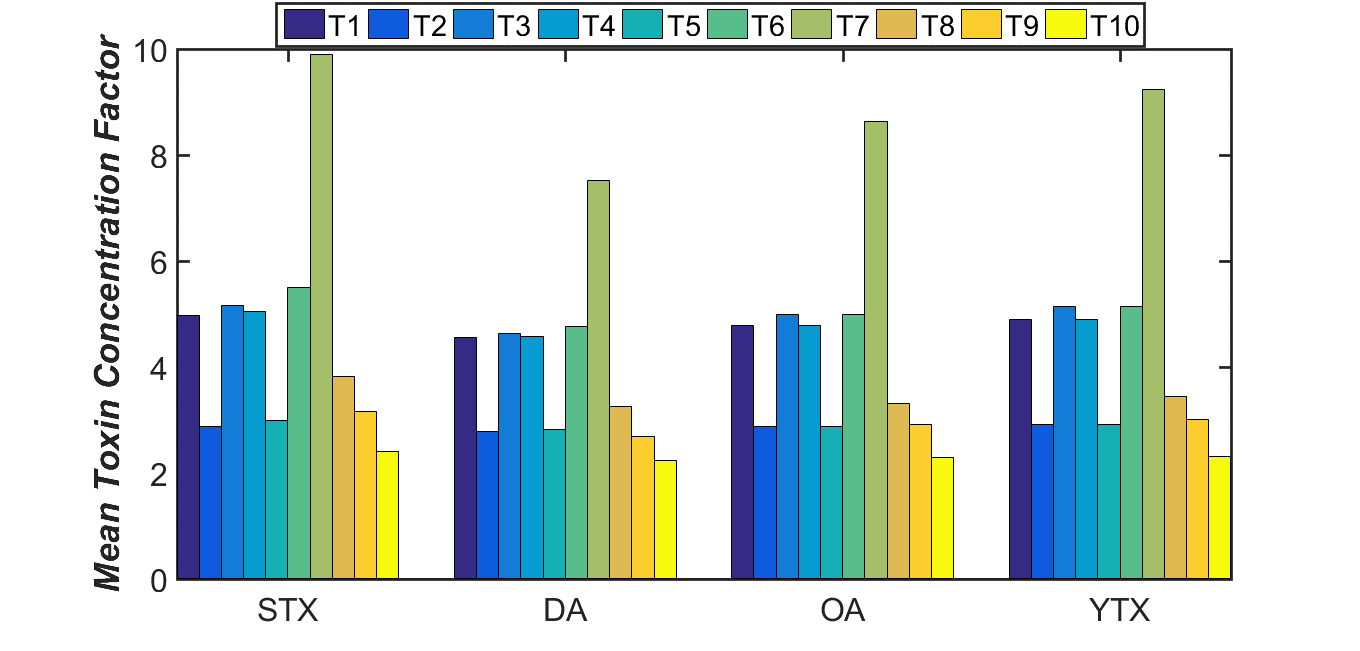


**Figure S9.** Mean toxin concentration factors for various algal toxins as a function of pretreatment configuration. T1–T10 refer to the same ten treatment train configurations evaluated in the pMFA.

5.3 Toxicity Fraction: Backwash Water vs. RO Reject

The contribution of either the backwash or brine waters to the overall toxicity of the pretreatment system waste streams was assessed for all pretreatment processes (Figure S10). For all toxin types, the backwash water was observed to contribute the most to the overall toxicity of the concentrated waste stream, which varied from 50 to 85% of the total toxicity. However, treatment processes without coagulation had a much higher contribution from the RO concentrate to the overall toxicity as compared to the backwash waters. The magnitude of the contribution to overall toxicity from backwash waters originating from processes without coagulation were much higher for DA toxins than STX, OA, and YTX alike (ranging from 55 to 80% of the total toxicity).


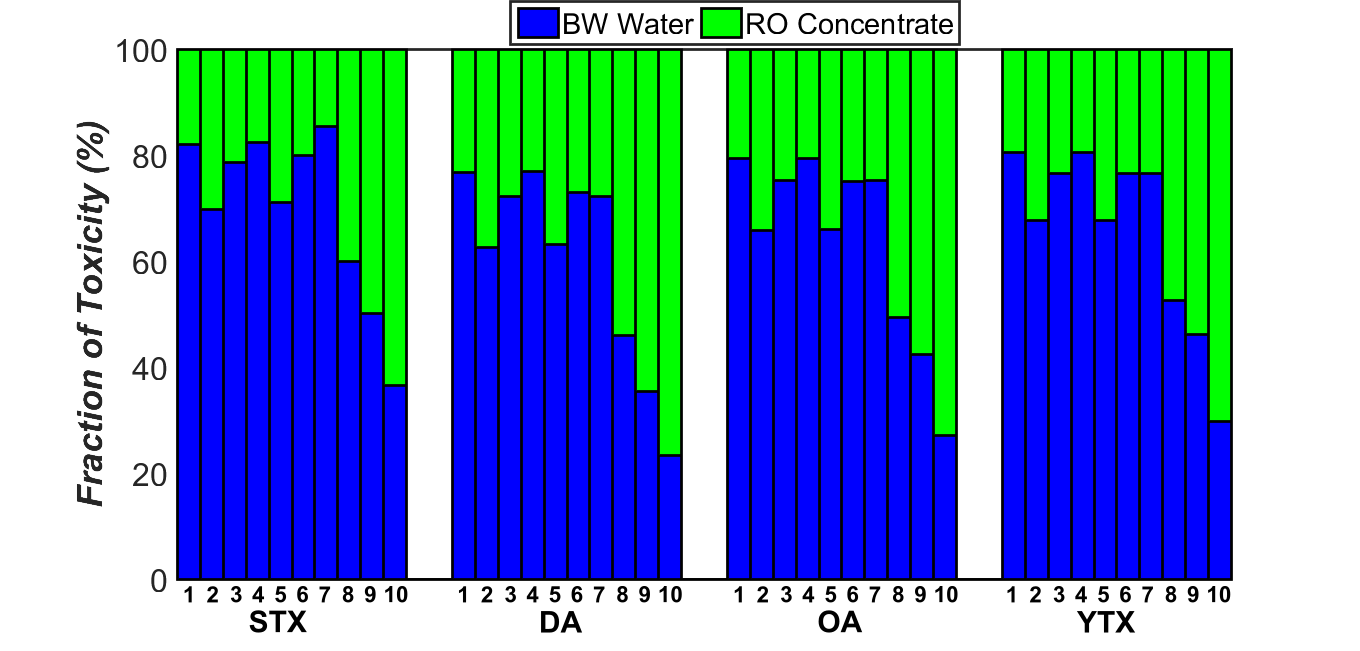


**Figure S10.** Relative fraction of toxicity of Backwash water and RO Concentrate for various algal toxins. T1–T10 refer to the same ten treatment train configurations evaluated in the pMFA.

6. Summary of p–values from ANOVA Testing

The p–values generated from the Tukey post hoc analysis comparing individual treatment trains (T1–T10) using the toxin concentration distributions of the permeate and backwash/brine reject waters are tabulated in Table S15. The results are organized according to toxin type (i.e. STX, DA, OA, YTX), toxin concentration distribution (permeate or brine/backwash waters) and treatment train comparison (i.e. T1 vs. T2). The grey shading indicates comparisons that were not statistically significant (p value < 0.05), while the remaining (no–shading) cells represent statistically significant comparisons. In addition, box and whisker plots summarizing the p–value results of the grouped comparisons (i.e. No Coag. Vs. Coag.) for backwash/brine reject waters are presented in Figure S11.

**
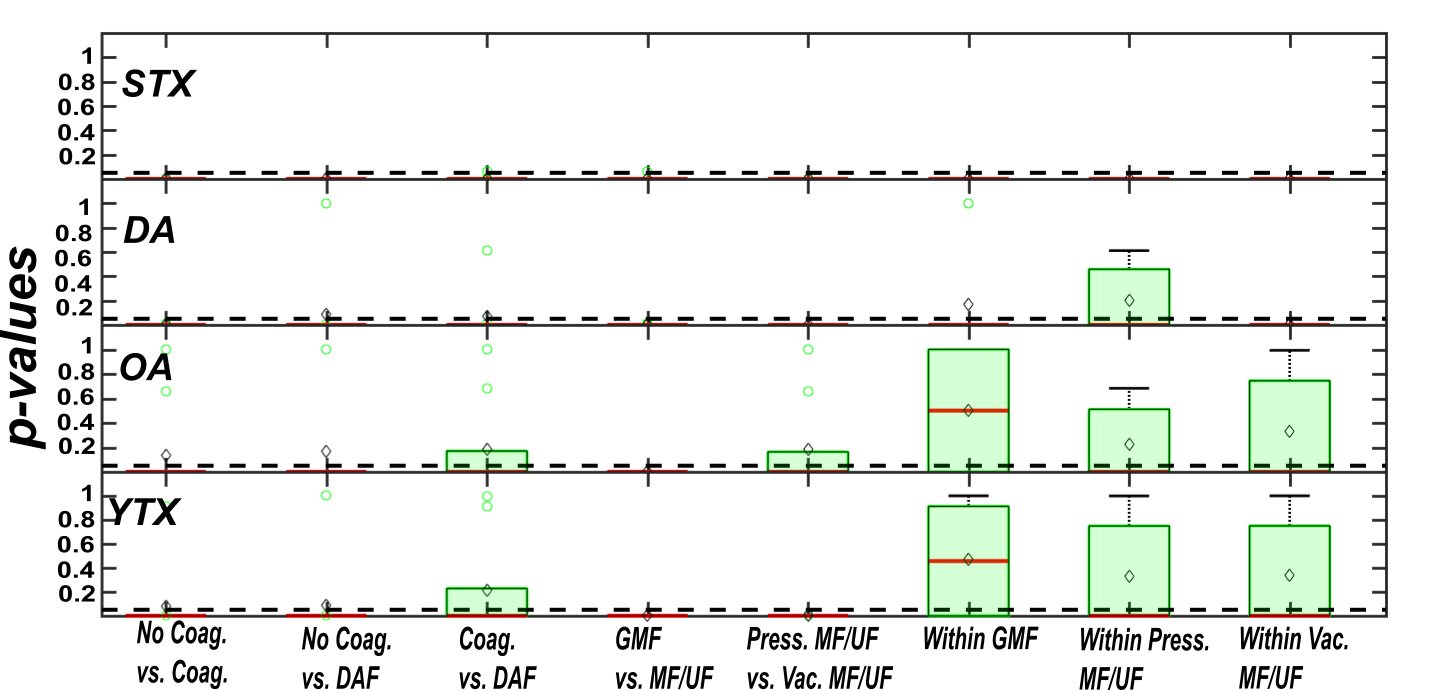
**

**Figure S11.**Box and whisker plots of p–values summarizing the Tukey post hoc comparison tests for the backwash/brine reject waters of each toxin (i.e. STX, DA, OA, YTX). The black dashed lines illustrate the significance level (0.05), while the red lines and black diamonds indicate the median and mean of p–values for each group, respectively. Circles represent outlying p–values from each comparison group.

**Table S11.** Tabulated p–values for the Tukey post hoc comparisons of T1–T10 treatment trains using permeate and backwash/brine water toxin concentration distributions. Grey shading indicates non–significant (p–value < 0.05) comparisons.

|  | ***Permeate Water*** | | | | ***Backwash/Brine Water*** | | | |
| --- | --- | --- | --- | --- | --- | --- | --- | --- |
| **STX** | **DA** | **OA** | **YTX** | **STX** | **DA** | **OA** | **YTX** |
| **Overall** | 0 | 0 | 0 | 0 | 0 | 0 | 0 | 0 |
| **T1 vs. T2** | 0.676 | 0.509 | 1 | 0.993 | 1.27E–07 | 1.27E–07 | 1.27E–07 | 1.27E–07 |
| **T1 vs. T3** | 1.27E–07 | 1.27E–07 | 1.27E–07 | 1.27E–07 | 1.27E–07 | 1.82E–06 | 1.27E–07 | 1.27E–07 |
| **T1 vs. T4** | 0.999 | 0.999 | 0.999 | 1 | 0.00388 | 0.611 | 0.682 | 0.999 |
| **T1 vs. T5** | 0.456 | 0.0928 | 1 | 1 | 1.27E–07 | 1.27E–07 | 1.27E–07 | 1.27E–07 |
| **T1 vs. T6** | 1.27E–07 | 1.27E–07 | 1.27E–07 | 1.27E–07 | 1.27E–07 | 1.27E–07 | 1.27E–07 | 1.27E–07 |
| **T1 vs. T7** | 1.27E–07 | 1.27E–07 | 1.27E–07 | 1.27E–07 | 1.27E–07 | 1.27E–07 | 1.27E–07 | 1.27E–07 |
| **T1 vs. T8** | 1.27E–07 | 1.27E–07 | 1.27E–07 | 1.27E–07 | 1.27E–07 | 1.27E–07 | 1.27E–07 | 1.27E–07 |
| **T1 vs. T9** | 1.27E–07 | 1.27E–07 | 1.27E–07 | 1.27E–07 | 1.27E–07 | 1.27E–07 | 1.27E–07 | 1.27E–07 |
| **T1 vs. T10** | 1.27E–07 | 1.27E–07 | 1.27E–07 | 1.27E–07 | 1.27E–07 | 1.27E–07 | 1.27E–07 | 1.27E–07 |
| **T2 vs. T3** | 1.27E–07 | 1.27E–07 | 1.27E–07 | 1.27E–07 | 1.27E–07 | 1.27E–07 | 1.27E–07 | 1.27E–07 |
| **T2 vs. T4** | 0.178 | 0.771 | 1 | 0.998 | 1.27E–07 | 1.27E–07 | 1.27E–07 | 1.27E–07 |
| **T2 vs. T5** | 1 | 0.998 | 1 | 1 | 0.0016 | 2.81E–05 | 0.992 | 1 |
| **T2 vs. T6** | 1.27E–07 | 1.27E–07 | 1.27E–07 | 1.27E–07 | 1.27E–07 | 1.27E–07 | 1.27E–07 | 1.27E–07 |
| **T2 vs. T7** | 1.27E–07 | 1.27E–07 | 1.27E–07 | 1.27E–07 | 1.27E–07 | 1.27E–07 | 1.27E–07 | 1.27E–07 |
| **T2 vs. T8** | 1.27E–07 | 1.27E–07 | 1.27E–07 | 1.27E–07 | 1.27E–07 | 1.27E–07 | 1.27E–07 | 1.27E–07 |
| **T2 vs. T9** | 1.27E–07 | 1.27E–07 | 1.27E–07 | 1.27E–07 | 1.27E–07 | 1.27E–07 | 0.996 | 1.60E–04 |
| **T2 vs. T10** | 1.27E–07 | 1.27E–07 | 1.27E–07 | 1.27E–07 | 1.27E–07 | 1.27E–07 | 1.27E–07 | 1.27E–07 |
| **T3 vs. T4** | 1.27E–07 | 1.27E–07 | 1.27E–07 | 1.27E–07 | 0.065 | 0.016 | 1.27E–07 | 1.27E–07 |
| **T3 vs. T5** | 1.27E–07 | 1.27E–07 | 1.27E–07 | 1.27E–07 | 1.27E–07 | 1.27E–07 | 1.27E–07 | 1.27E–07 |
| **T3 vs. T6** | 1 | 1 | 1 | 0.928 | 1.27E–07 | 1.27E–07 | 1 | 0.913 |
| **T3 vs. T7** | 1.27E–07 | 1 | 1 | 1 | 1.27E–07 | 1 | 1 | 1 |
| **T3 vs. T8** | 1.27E–07 | 1.27E–07 | 1.27E–07 | 1.27E–07 | 1.27E–07 | 1.27E–07 | 1.27E–07 | 1.27E–07 |
| **T3 vs. T9** | 1.27E–07 | 1.27E–07 | 1.27E–07 | 1.27E–07 | 1.27E–07 | 1.27E–07 | 1.27E–07 | 1.27E–07 |
| **T3 vs. T10** | 1.27E–07 | 1.27E–07 | 1.27E–07 | 1.27E–07 | 1.27E–07 | 1.27E–07 | 1.27E–07 | 1.27E–07 |
| **T4 vs. T5** | 0.0808 | 0.235 | 1 | 1 | 1.27E–07 | 1.27E–07 | 1.27E–07 | 1.27E–07 |
| **T4 vs. T6** | 1.27E–07 | 1.27E–07 | 1.27E–07 | 1.27E–07 | 1.27E–07 | 1.27E–07 | 1.27E–07 | 1.27E–07 |
| **T4 vs. T7** | 1.27E–07 | 1.27E–07 | 1.27E–07 | 1.27E–07 | 1.27E–07 | 0.016 | 1.27E–07 | 1.27E–07 |
| **T4 vs. T8** | 1.27E–07 | 1.27E–07 | 1.27E–07 | 1.27E–07 | 1.27E–07 | 1.27E–07 | 1.27E–07 | 1.27E–07 |
| **T4 vs. T9** | 1.27E–07 | 1.27E–07 | 1.27E–07 | 1.27E–07 | 1.27E–07 | 1.27E–07 | 1.27E–07 | 1.27E–07 |
| **T4 vs. T10** | 1.27E–07 | 1.27E–07 | 1.27E–07 | 1.27E–07 | 1.27E–07 | 1.27E–07 | 1.27E–07 | 1.27E–07 |
| **T5 vs. T6** | 1.27E–07 | 1.27E–07 | 1.27E–07 | 1.27E–07 | 1.27E–07 | 1.27E–07 | 1.27E–07 | 1.27E–07 |
| **T5 vs. T7** | 1.27E–07 | 1.27E–07 | 1.27E–07 | 1.27E–07 | 1.27E–07 | 1.27E–07 | 1.27E–07 | 1.27E–07 |
| **T5 vs. T8** | 1.27E–07 | 1.27E–07 | 1.27E–07 | 1.27E–07 | 1.27E–07 | 1.27E–07 | 1.27E–07 | 1.27E–07 |
| **T5 vs. T9** | 1.27E–07 | 1.27E–07 | 1.27E–07 | 1.27E–07 | 2.02E–07 | 1.27E–07 | 0.654 | 0.0018 |
| **T5 vs. T10** | 1.27E–07 | 1.27E–07 | 1.27E–07 | 1.27E–07 | 1.27E–07 | 1.27E–07 | 1.27E–07 | 1.27E–07 |
| **T6 vs. T7** | 1.27E–07 | 1 | 1 | 0.928 | 1.27E–07 | 1.27E–07 | 1 | 0.913 |
| **T6 vs. T8** | 1.27E–07 | 1.27E–07 | 1.27E–07 | 1.27E–07 | 1.27E–07 | 1.27E–07 | 1.27E–07 | 1.27E–07 |
| **T6 vs. T9** | 1.27E–07 | 1.27E–07 | 1.27E–07 | 1.27E–07 | 1.27E–07 | 1.27E–07 | 1.27E–07 | 1.27E–07 |
| **T6 vs. T10** | 1.27E–07 | 1.27E–07 | 1.27E–07 | 1.27E–07 | 1.27E–07 | 1.27E–07 | 1.27E–07 | 1.27E–07 |
| **T7 vs. T8** | 1.27E–07 | 1.27E–07 | 1.27E–07 | 1.27E–07 | 1.27E–07 | 1.27E–07 | 1.27E–07 | 1.27E–07 |
| **T7 vs. T9** | 1.27E–07 | 1.27E–07 | 1.27E–07 | 1.27E–07 | 1.27E–07 | 1.27E–07 | 1.27E–07 | 1.27E–07 |
| **T7 vs. T10** | 1.30E–07 | 1.27E–07 | 1.27E–07 | 1.27E–07 | 1.27E–07 | 1.27E–07 | 1.27E–07 | 1.27E–07 |
| **T8 vs. T9** | 1.55E–03 | 1.30E–07 | 0.994 | 1 | 1.27E–07 | 1.27E–07 | 1.27E–07 | 1.27E–07 |
| **T8 vs. T10** | 0.912 | 0.030 | 1 | 0.987 | 1.27E-–07 | 1.27E-–07 | 1.27E–07 | 1.27E–07 |
| **T9 vs. T10** | 1.26E–06 | 0.0501 | 0.999 | 0.967 | 1.27E–07 | 1.27E–07 | 1.27E–07 | 1.27E–07 |

References

1. Caron, D. A.; Garneau, M.–È.; Seubert, E.; Howard, M. D. A.; Darjany, L.; Schnetzer, A.; Cetinić, I.; Filteau, G.; Lauri, P.; Jones, B.; Trussell, S. Harmful algae and their potential impacts on desalination operations off southern California. *Water Res.* **2010**, *44*, 385–416.
2. Villacorte, L. O.; Tabatabai, S. A. A.; Anderson, D. M.; Amy, G. L.; Schippers, J. C.; Kennedy, M. D. Seawater reverse osmosis desalination and (harmful) algal blooms. *Desalination* **2015**, *360*, 61–80.
3. Jeffery, B.; Barlow, T.; Moizer, K.; Paul, S.; Boyle, C. Amnesic shellfish poison. *Food and Chemical Toxicology* **2004**, *42*, 545–557.
4. Shimizu, Y.; Hsu, C. P.; Genenah, A. Structure of saxitoxin in solutions and stereochemistry of dihydrosaxitoxins. *J. Am. Chem. Soc.* **1981**, *103*, 605–609.
5. Paz, B.; Daranas, A. H.; Norte, M.; Riobó, P.; Franco, J. M.; Fernández, J. J. Yessotoxins, a Group of Marine Polyether Toxins: an Overview. *Marine Drugs* **2008**, *6*, 73–102.
6. Prassopoulou, E.; Katikou, P.; Georgantelis, D.; Kyritsakis, A. Detection of okadaic acid and related esters in mussels during diarrhetic shellfish poisoning (DSP) episodes in Greece using the mouse bioassay, the PP2A inhibition assay and HPLC with fluorimetric detection. *Toxicon* **2009**, *53*, 214–227.
7. Bourne, D. G.; Blakeley, R. L.; Riddles, P.; Jones, G. J. Biodegradation of the cyanobacterial toxin microcystin LR in natural water and biologically active slow sand filters. *Water Research* **2006**, *40*, 1294–1302.
8. Teixeira, M. R.; Rosa, M. J. Microcystins removal by nanofiltration membranes. *Separation and Purification Technology* **2005**, *46*, 192–201.
9. Zabaglo, K.; Chrapusta, E.; Bober, B.; Kaminski, A.; Adamski, M.; Bialczyk, J. Environmental roles and biological activity of domoic acid: A review. *Algal Research* **2016**, *13*, 94–101.
10. Lefebvre, K. A.; Powell, C. L.; Busman, M.; Doucette, G. J.; Moeller, P. D. R.; Silver, J. B.; Miller, P. E.; Hughes, M. P.; Singaram, S.; Silver, M. W.; Tjeerdema, R. S. Detection of domoic acid in northern anchovies and california sea lions associated with an unusual mortality event. *Nat. Toxins* **1999**, *7*, 85–92.
11. Lewitus, A. J.; Horner, R. A.; Caron, D. A.; Garcia–Mendoza, E.; Hickey, B. M.; Hunter, M.; Huppert, D. D.; Kudela, R. M.; Langlois, G. W.; Largier, J. L.; Lessard, E. J.; RaLonde, R.; Jack Rensel, J. E.; Strutton, P. G.; Trainer, V. L.; Tweddle, J. F. Harmful algal blooms along the North American west coast region: History, trends, causes, and impacts. *Harmful Algae* **2012**, *19*, 133–159.
12. Anderson, P. D. Bioterrorism: Toxins as Weapons. *Journal of Pharmacy Practice* **2012**, *25*, 121–129.
13. Amade, P.; Mehiri, M.; Lewis, R. J. Outstanding Marine Biotoxins: STX, TTX, and CTX. In *Outstanding Marine Molecules*; Barre, S. L.; Kornprobst, J.–M., Eds.; Wiley–VCH Verlag GmbH & Co. KGaA, 2014; pp. 23–44.
14. Shumway, S. E.; Allen, S. M.; Dee Boersma, P. Marine birds and harmful algal blooms: sporadic victims or under–reported events? *Harmful Algae* **2003**, *2*, 1–17.
15. Lefebvre, K. A.; Trainer, V. L.; Scholz, N. L. Morphological abnormalities and sensorimotor deficits in larval fish exposed to dissolved saxitoxin. *Aquatic Toxicology* **2004**, *66*, 159–170.
16. Lefebvre, K. A.; Bill, B. D.; Erickson, A.; Baugh, K. A.; O’Rourke, L.; Costa, P. R.; Nance, S.; Trainer, V. L. Characterization of Intracellular and Extracellular Saxitoxin Levels in Both Field and Cultured *Alexandrium spp.* Samples from Sequim Bay, Washington. *Marine Drugs* **2008**, *6*, 103–116.
17. Jester, R. J.; Baugh, K. A.; Lefebvre, K. A. Presence of *Alexandrium catenella* and paralytic shellfish toxins in finfish, shellfish and rock crabs in Monterey Bay, California, USA. *Mar. Biol.* **2009**, *156*, 493.
18. Hallegraeff, G. M.; Anderson, D. M.; Cembella, A. D.; Enevoldsen, H. O. *Manual on Harmful Marine Microalgae*; Unesco, 2003.
19. Dominguez, H. J.; Paz, B.; Daranas, A. H.; Norte, M.; Franco, J. M.; Fernández, J. J. Dinoflagellate polyether within the yessotoxin, pectenotoxin and okadaic acid toxin groups: Characterization, analysis and human health implications. *Toxicon* **2010**, *56*, 191–217.
20. Valdiglesias, V.; Fernández–Tajes, J.; Méndez, J.; Pásaro, E.; Laffon, B. The marine toxin okadaic acid induces alterations in the expression level of cancer–related genes in human neuronal cells. *Ecotoxicology and Environmental Safety* **2013**, *92*, 303–311.
21. Paz, B.; Riobó, P.; Luisa Fernández, M.; Fraga, S.; Franco, J. M. Production and release of yessotoxins by the dinoflagellates *Protoceratium reticulatum* and *Lingulodinium polyedrum* in culture. *Toxicon* **2004**, *44*, 251–258.
22. Tubaro, A.; Dell’Ovo, V.; Sosa, S.; Florio, C. Yessotoxins: A toxicological overview. *Toxicon* **2010**, *56*, 163–172.
23. Aune, T.; Sørby, R.; Yasumoto, T.; Ramstad, H.; Landsverk, T. Comparison of oral and intraperitoneal toxicity of yessotoxin towards mice. *Toxicon* **2002**, *40*, 77–82.
24. Malagoli, D.; Marchesini, E.; Ottaviani, E. Lysosomes as the target of yessotoxin in invertebrate and vertebrate cell lines. *Toxicology Letters* **2006**, *167*, 75–83.
25. Sangster, J. Octanol–Water Partition Coefficients: Fundamentals and Physical Chemistry; John Wiley & Sons, 1997.
26. Wells, M. J. M. Log DOW: Key to Understanding and Regulating Wastewater–Derived Contaminants. *Environ. Chem.* **2006**, *3*, 439–449.
27. Wells, M. J. M.; Yu, L. Z. Solid–phase extraction of acidic herbicides. *Journal of Chromatography A* **2000**, *885*, 237–250.
28. Fux, E. Development and Evaluation of Passive Sampling And LC–MS Based Techniques For The Detection And Monitoring Of Lipophilic Marine Toxins in Mesocosm and Field Studies (Doctoral Dissertation). **2008**. Retrieved from http://arrow.dit.ie/cgi/viewcontent.cgi?article=1054&context=sciendoc.
29. Drikas, M., Chow, C. W. K., House, J., & Burch, M. D. Using coagulation, flocculation, and settling to remote toxic cyanobacteria. *Journal – American Water Works Association* **2001**, *93(2)*, 100–111.
30. Ghernaout, B.; Ghernaout, D.; Saiba, A. Algae and cyanotoxins removal by coagulation/flocculation: A review. *Desalin. Water Treat.* **2010**, *20*, 133–143.
31. de Maagd, P. G.–J.; Hendriks, A. J.; Seinen, W.; Sijm, D. T. H. M. pH–Dependent hydrophobicity of the cyanobacteria toxin microcystin–LR. *Water Res.* **1999**, *33*, 677–680.
32. Liu, G.; Qian, Y.; Dai, S.; Feng, N. Adsorption of Microcystin LR and LW on Suspended Particulate Matter (SPM) at Different pH. *Water Air Soil Pollut* **2008**, *192*, 67–76.
33. Emelko, M. B.; Huck, P. M.; Coffey, B. M.; Smith, E. F. Effects of media, backwash, and temperature on full–scale biological filtration. *Journal (American Water Works Association)* **2006**, *98*, 61–73.
34. Babel, S.; Takizawa, S. Microfiltration membrane fouling and cake behavior during algal filtration. *Desalination* **2010**, *261*, 46–51.
35. Castaing, J. B.; Massé, A.; Séchet, V.; Sabiri, N.–E.; Pontié, M.; Haure, J.; Jaouen, P. Immersed hollow fibres microfiltration (MF) for removing undesirable micro–algae and protecting semi–closed aquaculture basins. *Desalination* **2011**, *276*, 386–396.
36. Boerlage, S.; Nada, N. Algal toxin removal in seawater desalination processes. *Desalin. Water Treat.* **2015**, *55*, 2575–2593.
37. Rogers, R. S.; Rapoport, H. The pKa’s of saxitoxin. *J. Am. Chem. Soc.* **1980**, *102*, 7335–7339.
38. Burns, J. M.; Hall, S.; Ferry, J. L. The adsorption of saxitoxin to clays and sediments in fresh and saline waters. *Water Res.* **2009**, *43*, 1899–1904.
39. Falk, M.; Seto, P. F.; Walter, J. A. Solubility of domoic acid in water and in non–aqueous solvents. *Can. J. Chem.* **1991**, *69*, 1740–1744.
40. Burns, J. M.; Ferry, J. L. Adsorption of domoic acid to marine sediments and clays. *Journal of Environmental Monitoring* **2007**, *9*, 1373.
41. Grützmacher, G.; Wessel, G.; Klitzke, S.; Chorus, I. Microcystin Elimination During Sediment Contact. *Environ. Sci. Technol.* **2010**, *44*, 657–662.
42. *Seawater Reverse Osmosis Desalination Pilot Test Program Report*; Santa Cruz Water District: Santa Cruz, CA, (2010).
43. Campinas, M.; Rosa, M. J. Evaluation of cyanobacterial cells removal and lysis by ultrafiltration. *Separation and Purification Technology* **2010**, *70*, 345–353.
44. Dixon, M. B.; Richard, Y.; Ho, L.; Chow, C. W. K.; O’Neill, B. K.; Newcombe, G. A coagulation–powdered activated carbon–ultrafiltration – Multiple barrier approach for removing toxins from two Australian cyanobacterial blooms. *Journal of Hazardous Materials* **2011**, *186*, 1553–1559.
45. Grützmacher, G.; Böttcher, G.; Chorus, I.; Bartel, H. Removal of microcystins by slow sand filtration. *Environ. Toxicol.* **2002**, *17*, 386–394.
46. Lee, J.; Walker, H. W. Mechanisms and factors influencing the removal of microcystin–LR by ultrafiltration membranes. *Journal of Membrane Science* **2008**, *320*, 240–247.
47. Voutchkov, N. Considerations for selection of seawater filtration pretreatment system. *Desalination* **2010**, *261*, 354–364.
48. Voutchkov, N. *Desalination engineering: planning and design*. McGraw Hill Professional, 2011.
49. Sasaki, T.; Okabe, J.; Henmi, M.; Hayashi, H.; Iida, Y. Cesium (Cs) and strontium (Sr) removal as model materials in radioactive water by advanced reverse osmosis membrane. *Desalin. Water Treat.* **2013**, *51*, 1672–1677.
50. Laycock, M. V.; Anderson, D. M.; Naar, J.; Goodman, A.; Easy, D. J.; Donovan, M. A.; Li, A.; Quilliam, M. A.; Al Jamali, E.; Alshihi, R. Laboratory desalination experiments with some algal toxins. *Desalination* **2012**, *293*, 1–6.
51. Seubert, E. L.; Trussell, S.; Eagleton, J.; Schnetzer, A.; Cetinić, I.; Lauri, P.; Jones, B. H.; Caron, D. A. Algal toxins and reverse osmosis desalination operations: Laboratory bench testing and field monitoring of domoic acid, saxitoxin, brevetoxin and okadaic acid. *Water Res.* **2012**, *46*, 6563–6573.
52. Paredes, I.; Rietjens, I. M. C. M.; Vieites, J. M.; Cabado, A. G. Update of risk assessments of main marine biotoxins in the European Union. *Toxicon* **2011**, *58*, 336–354.
53. Fowle, J. R.; Dearfield, K. L. *Risk Characterization Handbook*; EPA 100–B–00–002; U.S. EPA Science Policy Council: 2000.
54. Hoeger, S. J.; Hitzfeld, B. C.; Dietrich, D. R. Occurrence and elimination of cyanobacterial toxins in drinking water treatment plants. *Toxicology and Applied Pharmacology* **2005**, *203*, 231–242.
55. Schmidt, W.; Willmitzer, H.; Bornmann, K.; Pietsch, J. Production of drinking water from raw water containing cyanobacteria—pilot plant studies for assessing the risk of microcystin breakthrough. *Environ. Toxicol.* **2002**, *17*, 375–385.
56. Schmidt, W.; Petzoldt, H.; Bornmann, K.; Imhof, L.; Moldaenke, C. Use of cyanopigment determination as an indicator of cyanotoxins in drinking water. *Water Sci. Technol.* **2009**, *59*, 1531–1540.
57. Jurczak, T.; Tarczynska, M.; Izydorczyk, K.; Mankiewicz, J.; Zalewski, M.; Melilot, J. Elimination of microcystins by water treatment processes—examples from Sulejow Reservoir, Poland. *Water Research* **2005**, *39*, 2394–2406.
58. Hoeger, S. J.; Shaw, G.; Hitzfeld, B. C.; Dietrich, D. R. Occurrence and elimination of cyanobacterial toxins in two Australian drinking water treatment plants. *Toxicon* **2004**, *43*, 639–649.
59. Drikas, M.; Chow, C. W. K.; House, J.; Burch, M. D. Toxic cyanobacteria. *American Water Works Association Journal* **2001***, 93*(2), 100.
60. Zhang, Y.; Tian, J.; Nan, J.; Gao, S.; Liang, H.; Wang, M.; Li, G. Effect of PAC addition on immersed ultrafiltration for the treatment of algal–rich water. *Journal of Hazardous Materials* **2011**, *186*, 1415–1424.
61. Lee, J.; Walker, H. W. Effect of Process Variables and Natural Organic Matter on Removal of Microcystin–LR by PAC−UF. *Environ. Sci. Technol.* **2006**, *40*, 7336–7342.
62. Gijsbertsen–Abrahamse, A. J.; Schmidt, W.; Chorus, I.; Heijman, S. G. J. Removal of cyanotoxins by ultrafiltration and nanofiltration. *Journal of Membrane Science* **2006**, *276*, 252–259.
